# Supplementary material for: A Machine-learning Approach for the Assessment of the Proliferative Compartment of Solid Tumors on Hematoxylin-Eosin-Stained Sections
Source: PubMed Central journal article supplement (PMC7281627; doi:10.3390/cancers12051344), 2020-05-25
Supplement: cancers-12-01344-s001.pdf [file cancers-12-01344-s001.pdf]

# A Machine-Learning Approach for the Assessment of the Proliferative Compartment of Solid Tumors on Hematoxylin-Eosin Stained Sections

Francesco Martino, Silvia Varricchio, Daniela Russo, Francesco Merolla, Gennaro Ilardi, Massimo Mascolo, Giovanni Orabona dell'Aversana, Luigi Califano, Guglielmo Toscano, Giuseppe De Pietro, Maria Frucci, Nadia Brancati, Filippo Fraggetta and Stefania Staibano

## Supplementary Materials

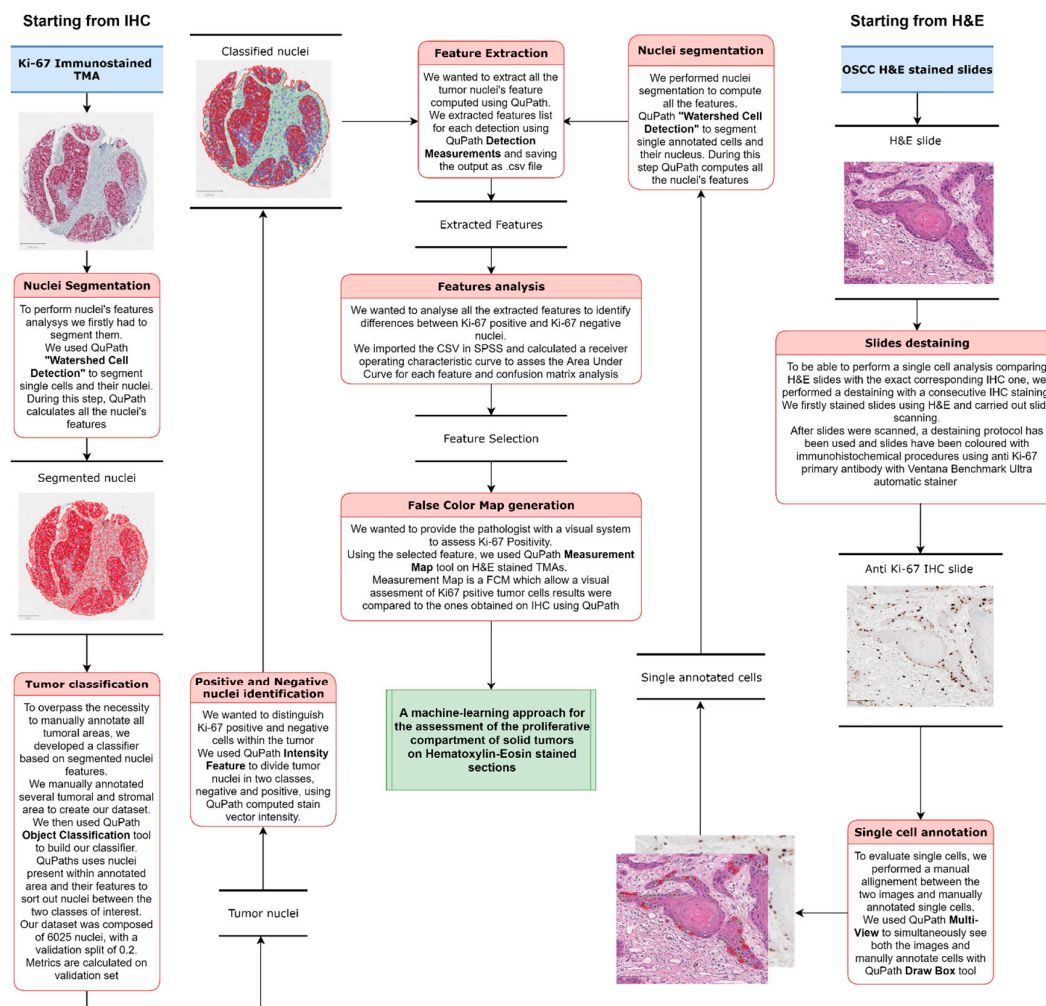

Figure S1. Flow chart of the study's design.

**Table S1.** List of QuPath computed nuclear features (OD: Optical Density).

| Compartment           | Features                |
|-----------------------|-------------------------|
| Nucleus:              | Area                    |
|                       | Perimeter               |
|                       | Circularity             |
|                       | Max caliper             |
|                       | Min caliper             |
|                       | Eccentricity            |
|                       | Hematoxylin OD mean     |
|                       | Hematoxylin OD sum      |
|                       | Hematoxylin OD std dev  |
|                       | Hematoxylin OD max      |
|                       | Hematoxylin OD min      |
|                       | Hematoxylin OD range    |
|                       | Stain Vector OD mean    |
|                       | Stain Vector OD sum     |
|                       | Stain Vector OD std dev |
|                       | Stain Vector OD max     |
| Stain Vector OD min   |                         |
| Stain Vector OD range |                         |
| Cell:                 | Area                    |
|                       | Perimeter               |
|                       | Circularity             |
|                       | Max caliper             |
|                       | Min caliper             |
|                       | Eccentricity            |
|                       | Hematoxylin OD mean     |
|                       | Hematoxylin OD sum      |
|                       | Hematoxylin OD std dev  |
|                       | Hematoxylin OD max      |
|                       | Hematoxylin OD min      |
|                       | Hematoxylin OD range    |
|                       | Stain Vector OD mean    |
|                       | Stain Vector OD sum     |
|                       | Stain Vector OD std dev |
|                       | Stain Vector OD max     |
| Stain Vector OD min   |                         |
| Stain Vector OD range |                         |
| Cytoplasm:            | Area                    |
|                       | Perimeter               |
|                       | Circularity             |
|                       | Max caliper             |
|                       | Min caliper             |
|                       | Eccentricity            |
|                       | Hematoxylin OD mean     |
|                       | Hematoxylin OD sum      |
|                       | Hematoxylin OD std dev  |
|                       | Hematoxylin OD max      |
|                       | Hematoxylin OD min      |
|                       | Hematoxylin OD range    |
|                       | Stain Vector OD mean    |
|                       | Stain Vector OD sum     |
|                       | Stain Vector OD std dev |
|                       | Stain Vector OD max     |
| Stain Vector OD min   |                         |
| Stain Vector OD range |                         |
